# Supplementary material for: Rpt5-Derived Analogs Stimulate Human Proteasome Activity in Cells and Degrade Proteins Forming Toxic Aggregates in Age-Related Diseases
Source: MDPI journal article supplement (doi:10.3390/ijms25094663), 2024-04-25
Supplement: s1 [file s1]

### Supplementary figures

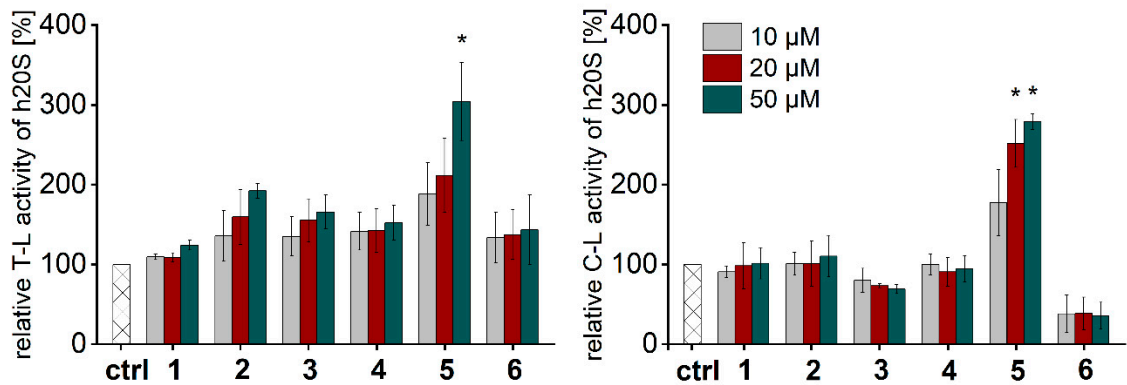

**Figure S1.** The capacity of compounds 1-6 for stimulating T-L and C-L activities of human 20S proteasome. Only the peptide corresponding to the C-terminus of the Rpt5 subunit (5) increased the activities of the 20S in a dose-dependent manner. All activity assays were performed in two independent replicates. Results are expressed as a percentage of activity of the latent 20S and are presented as the mean  $\pm$  SD. Ordinary one-way ANOVA was used to determine statistical significance (\* $p < 0.05$ ).

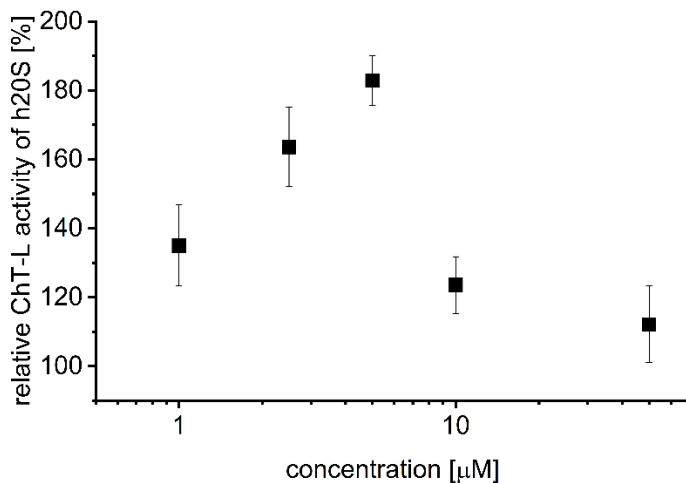

**Figure S2.** The chymotrypsin-like activity of human 20S proteasome was activated by Rpt6-derived C-terminal peptide (compound 6) at lower concentrations with maximum activation observed at 5 μM, which was followed by a systematic decrease in efficacy. The results of three independent replicates are presented as the mean  $\pm$  SD.

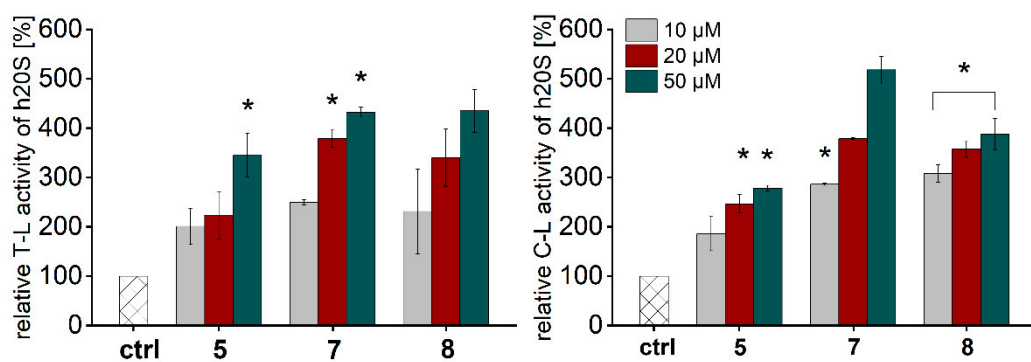

**Figure S3.** The influence of the peptide chain length on T-L and C-L activity of the human 20S proteasome. The activity assays were performed in two independent replicates. Results are expressed as a percentage of activity of the latent 20S and are presented as the mean  $\pm$  SD. Ordinary one-way ANOVA was used to determine statistical significance (\* $p < 0.05$ ).

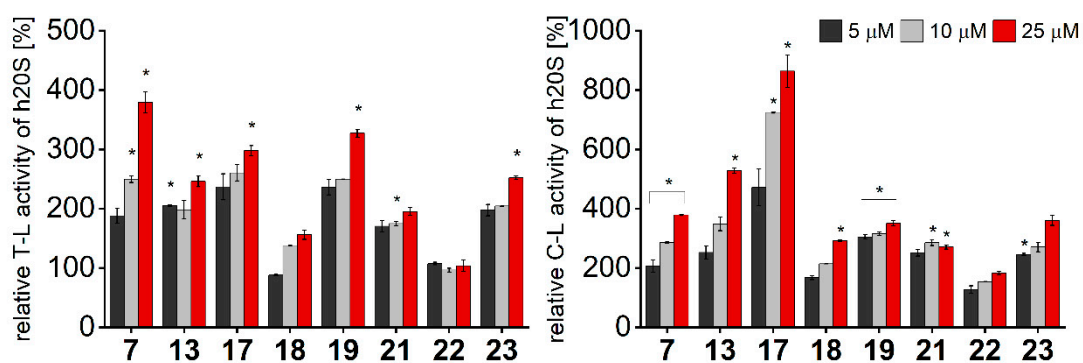

**Figure S4.** The influence of compound 7 analogs on the T-L and C-L activity of human 20S proteasome. The results of two independent replicates are presented as the mean  $\pm$  SD. Ordinary one-way ANOVA was used to determine statistical significance (\* $p < 0.05$ ).

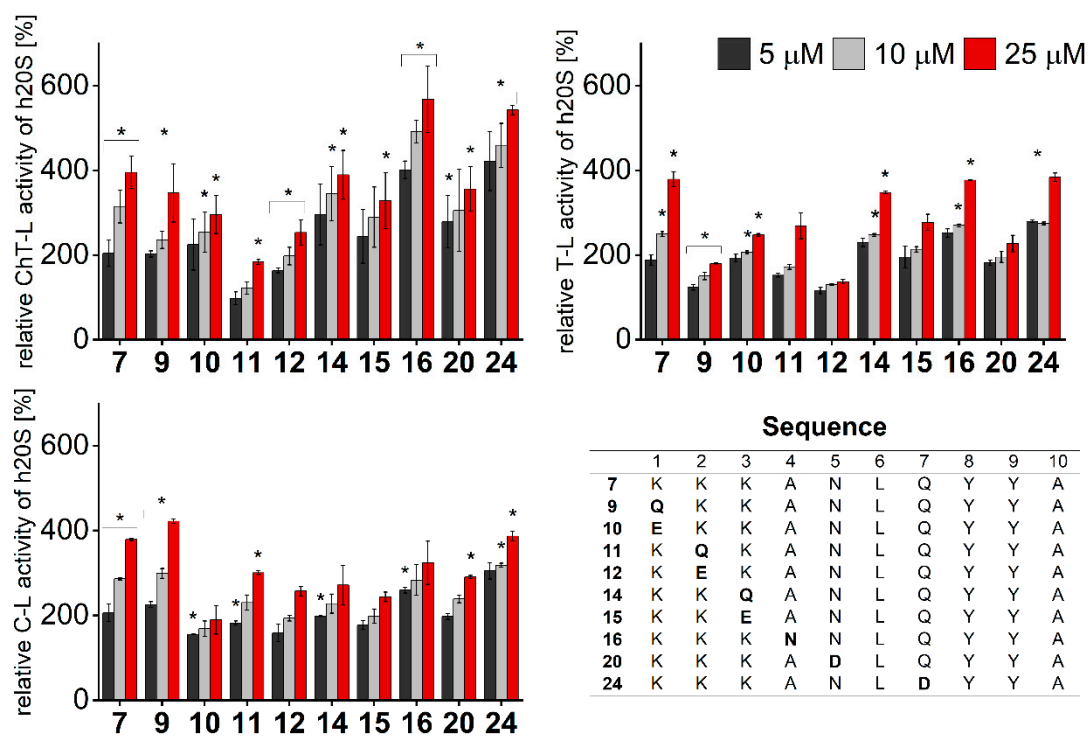

**Figure S5.** The influence of the compound 7 analogs on the ChT-L, T-L, and C-L activity of human 20S proteasome. For ChT-L activity three, and for T-L and C-L activity two independent replicates were performed. The results are presented as mean  $\pm$  SD. Ordinary one-way ANOVA was used to determine statistical significance (\* $p$  < 0.05).

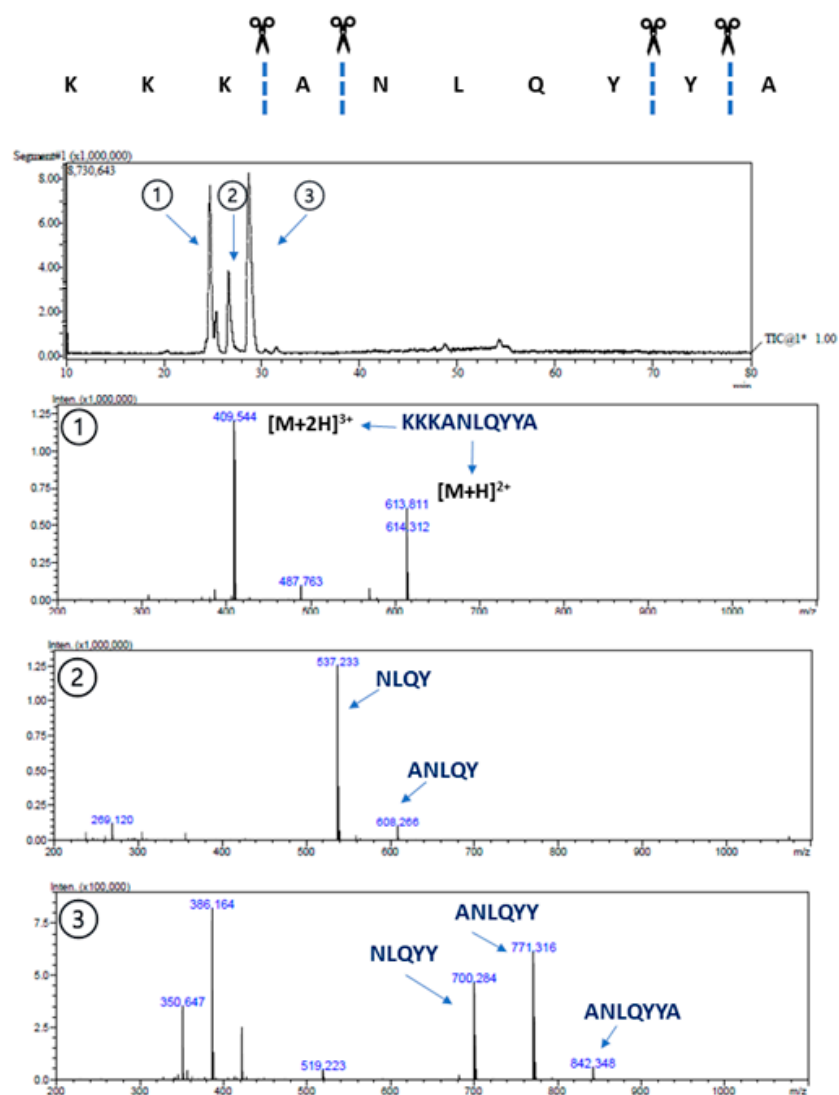

**Figure S6.** Cleavage sites of the peptide 7 by the 20S proteasome determined based on  $m/z$  signals corresponding to the individual fragments of the compound, detected by ESI-IT-TOF LCMS (Prominence, Shimadzu).

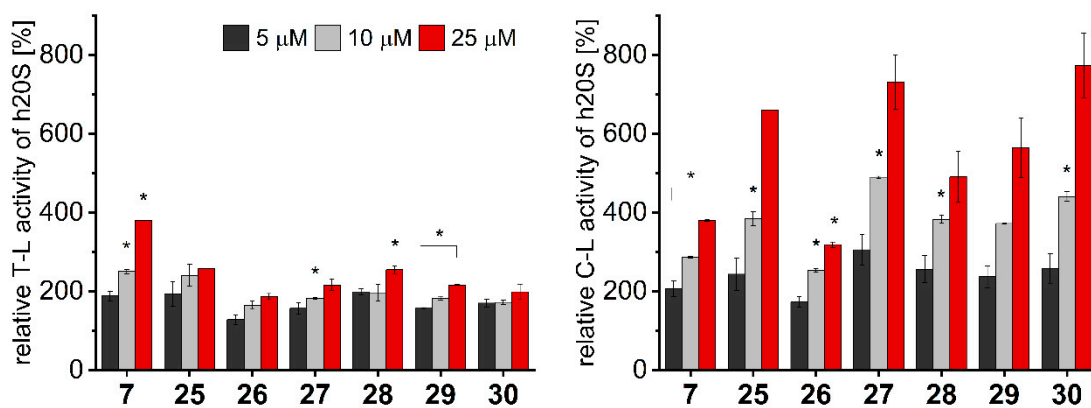

**Figure S7.** The influence of peptidomimetics based on compound **7** on the T-L and C-L activity of human 20S proteasome. The results of two independent replicates are presented as the mean  $\pm$  SD. Ordinary one-way ANOVA was used to determine statistical significance ( $p < 0.05$ ).

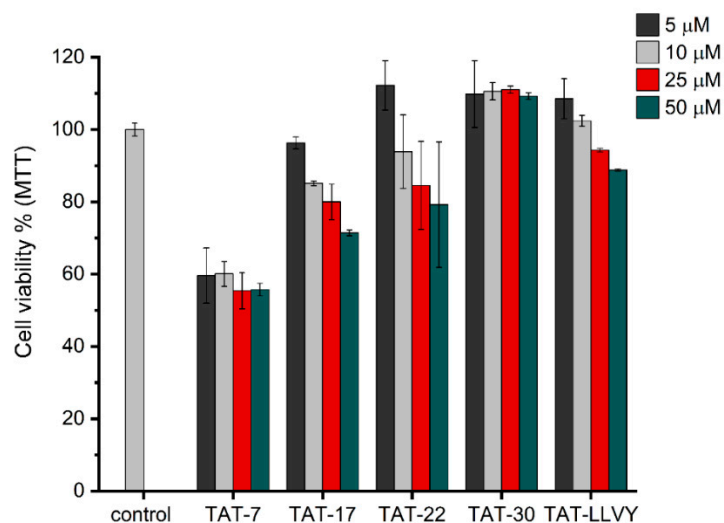

**Figure S8.** The viability of HEK293T cells was not significantly affected after treatment with TAT-7, TAT-17, TAT-22, and TAT-LLVY. TAT-30 did not exert any cytotoxic effect on of the cells. The results of the MTT assay, conducted in three independent replicates, are presented as the mean  $\pm$  SD.

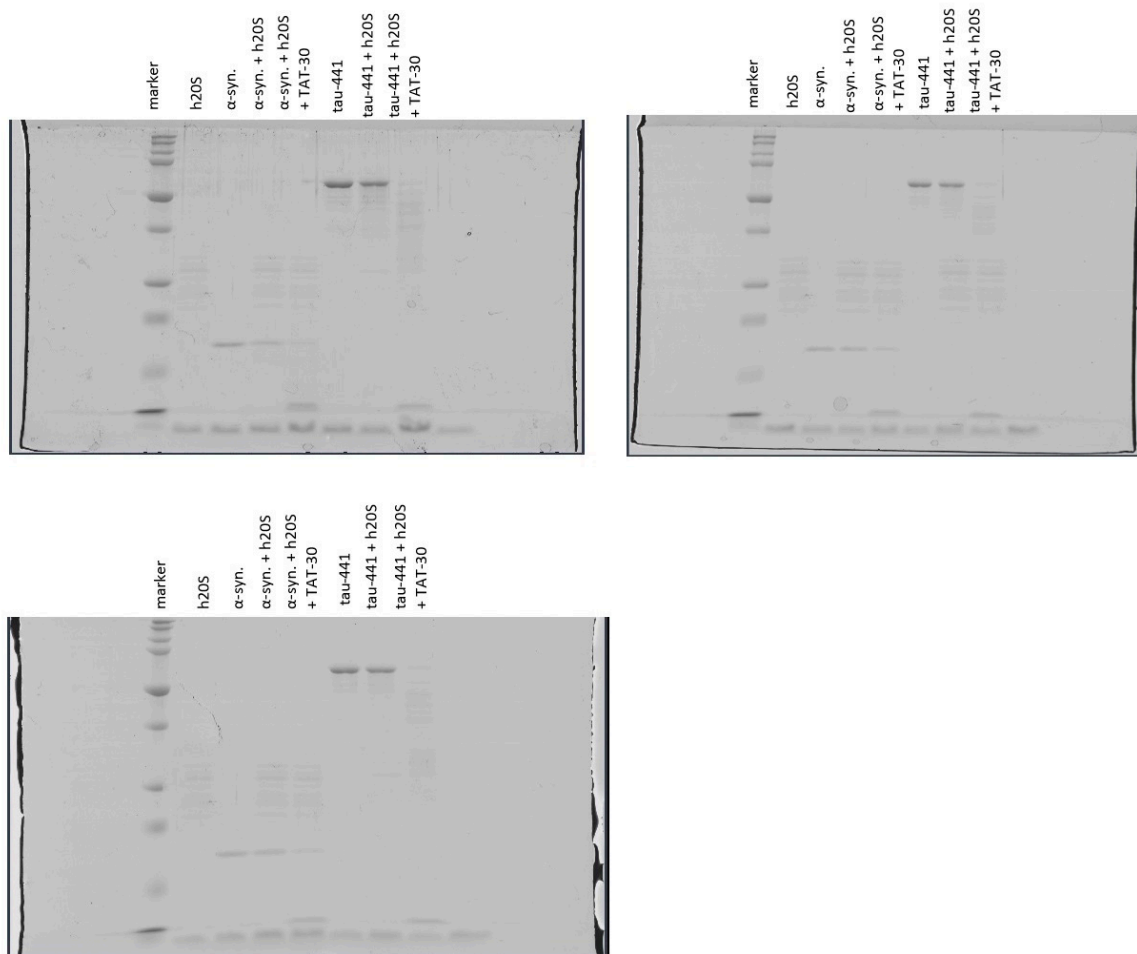

**Figure S9.** SDS PAGE gels of  $\alpha$ -synuclein and Tau-441 degradation by the 20S in the presence of **TAT-30** activator at 10  $\mu$ M concentration. Precision Plus Protein™ Dual Xtra Prestained Protein Standards (Biorad) was used as a marker (bands: 2, 5, 10, 15, 20, 25, 37, 50, 75, 100, 150, and 250kDa).
